# Supplementary material for: Synergistically enhanced performance of transition-metal doped Ni2P for supercapacitance and overall water splitting
Source: Royal Society of Chemistry journal article supplement (doi:10.1039/d1dt01058a), 2021-01-01
Supplement: d1dt01058a1.pdf [file d1dt01058a1.pdf]

## Supplementary Data

### **Synergistically enhanced performance of transition-metal doped Ni<sub>2</sub>P for supercapacitance and overall water splitting**

Gwaza E. Ayom,<sup>a</sup> Malik D. Khan,<sup>a,b</sup> Jonghyun Choi<sup>c</sup>, Ram K. Gupta,<sup>c</sup> Werner E. van Zyl,<sup>d</sup> Neerish Revaprasadu<sup>a\*</sup>

<sup>a</sup>Department of Chemistry, University of Zululand, Private Bag X1001, KwaDlangezwa 3880, South Africa.

<sup>b</sup>Institute of Physical Chemistry, Polish Academy of Sciences, Kasprzaka 44/52, 01-224, Warsaw, Poland.

<sup>c</sup>Department of Chemistry, Pittsburg State University, Pittsburg, KS 66762, USA.

<sup>d</sup>School of Chemistry and Physics, University of KwaZuluNatal, Westville Campus, Durban, South Africa.

\*Email: [RevaprasaduN@unizulu.ac.za](mailto:RevaprasaduN@unizulu.ac.za)

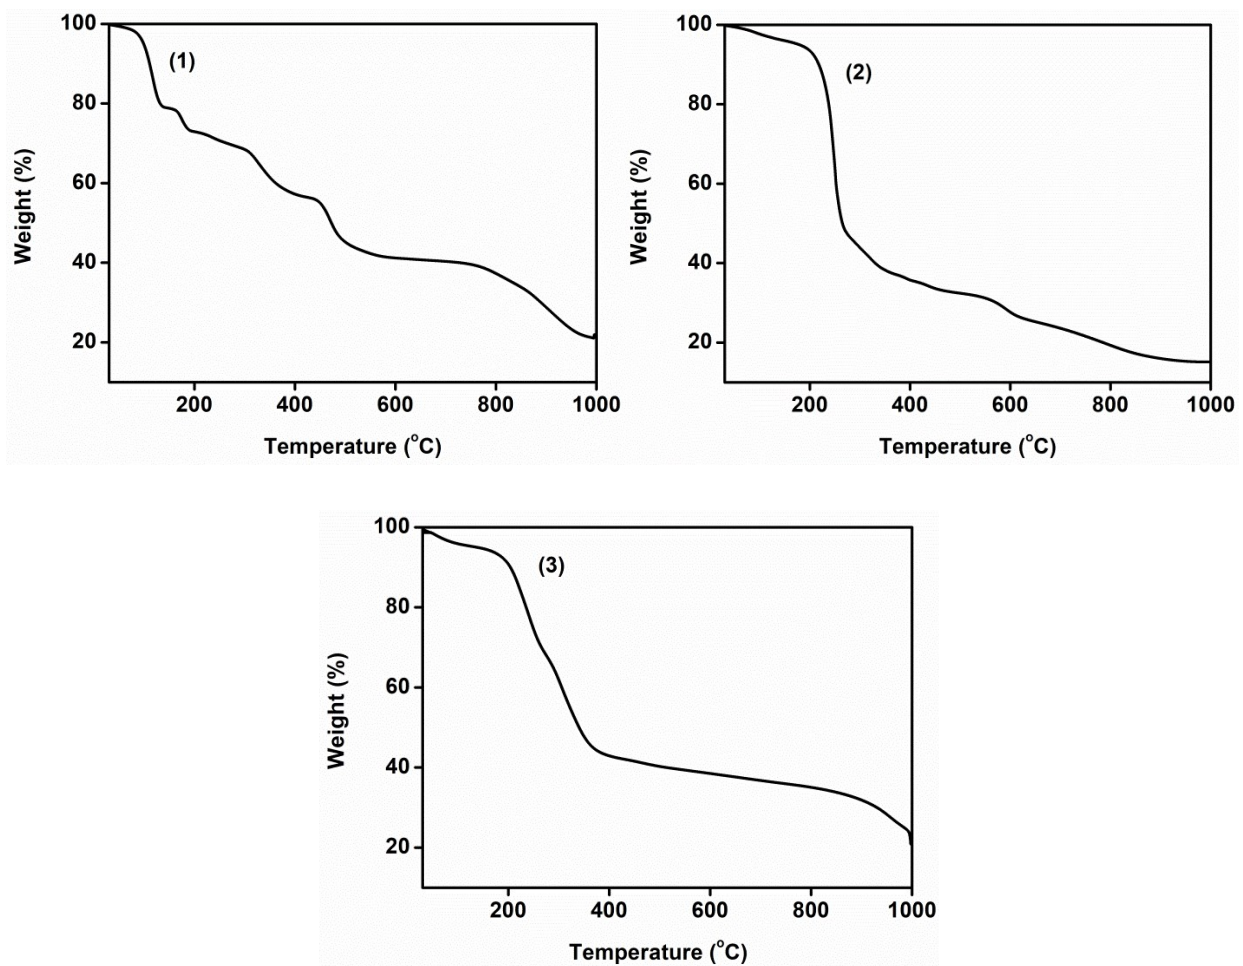

Figure S1: Thermographic curves for  $[\text{Ni}\{\text{S}_2\text{P}(\text{OH})(4\text{-CH}_3\text{OC}_6\text{H}_4)\}_2]$  (1),  $[\text{Co}\{\text{S}_2\text{P}(\text{OC}_4\text{H}_9)(4\text{-CH}_3\text{OC}_6\text{H}_4)\}_3]$  (2) and  $[\text{Fe}\{\text{S}_2\text{P}(\text{OH})(4\text{-CH}_3\text{OC}_6\text{H}_4)\}_3]$  (3).

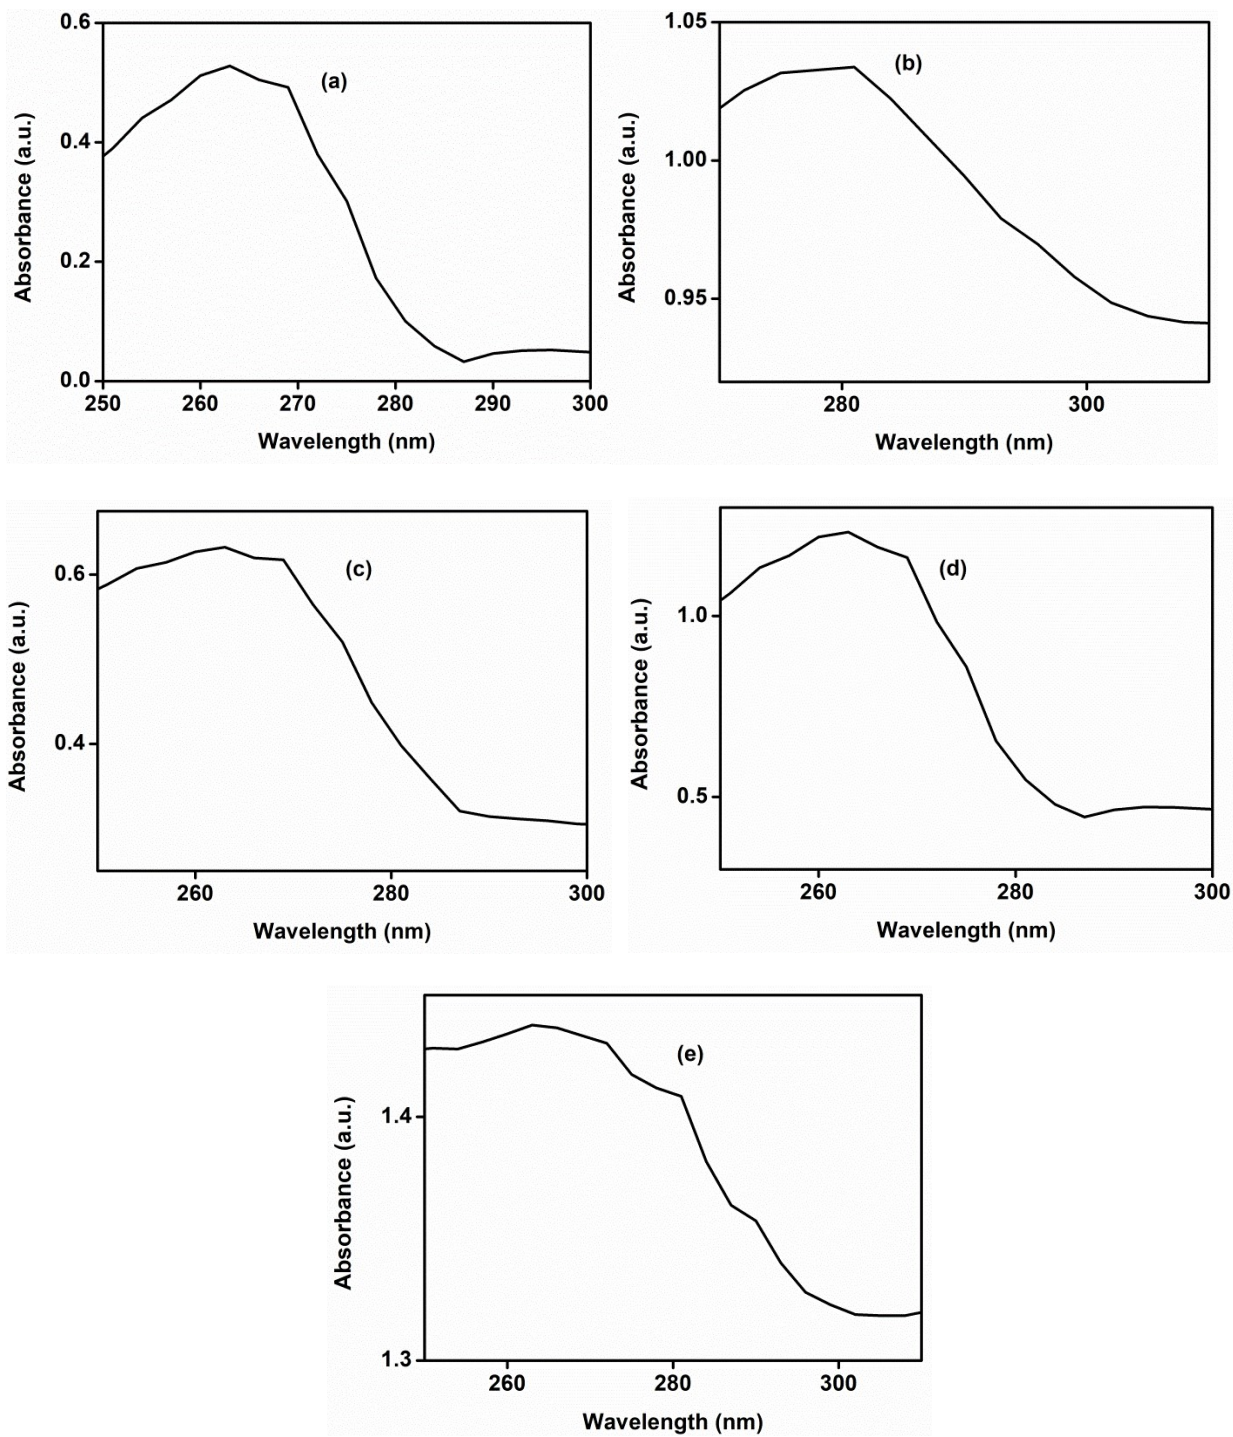

Figure S2: UV-vis absorption spectra of (a) Ni<sub>2</sub>P (b) 5% Co-doped Ni<sub>2</sub>P (c) 10% Co-doped Ni<sub>2</sub>P (d) 5% Fe-doped Ni<sub>2</sub>P and (e) 10% Fe-doped Ni<sub>2</sub>P nanoparticles.

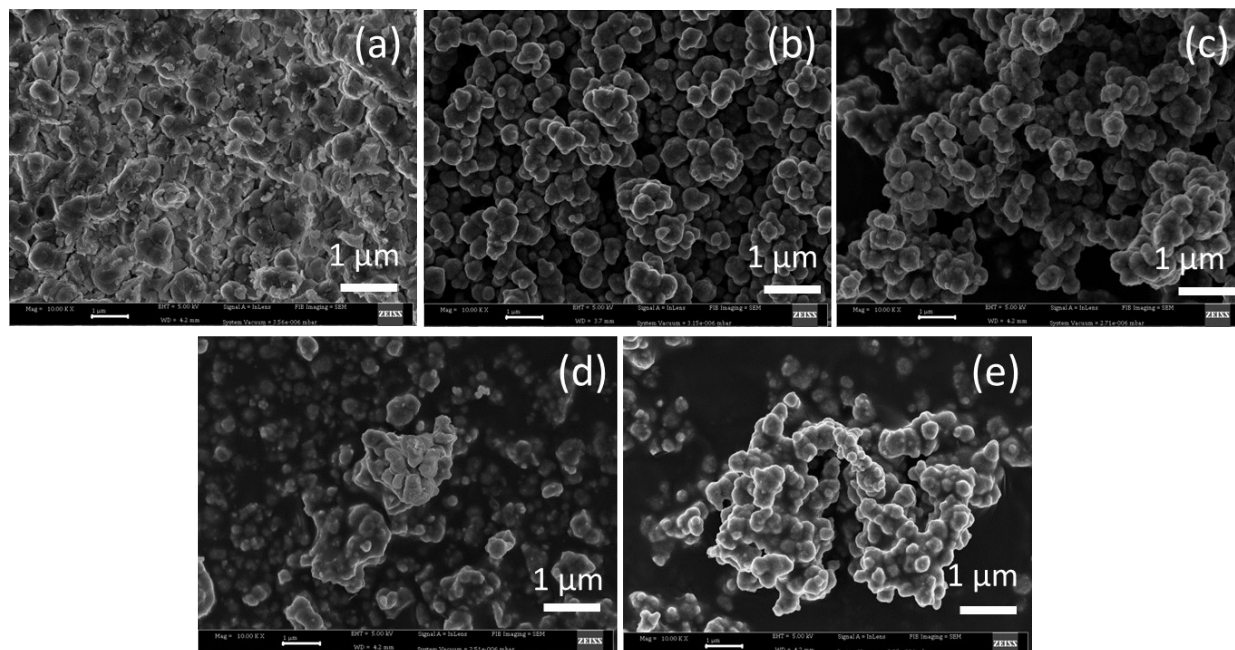

Figure S3: SEM images of (a) Ni<sub>2</sub>P (b) 5% Co-doped Ni<sub>2</sub>P, (c) 10% Co-doped Ni<sub>2</sub>P, (d) 5% Fe-doped Ni<sub>2</sub>P and (e) 10% Fe-doped Ni<sub>2</sub>P.

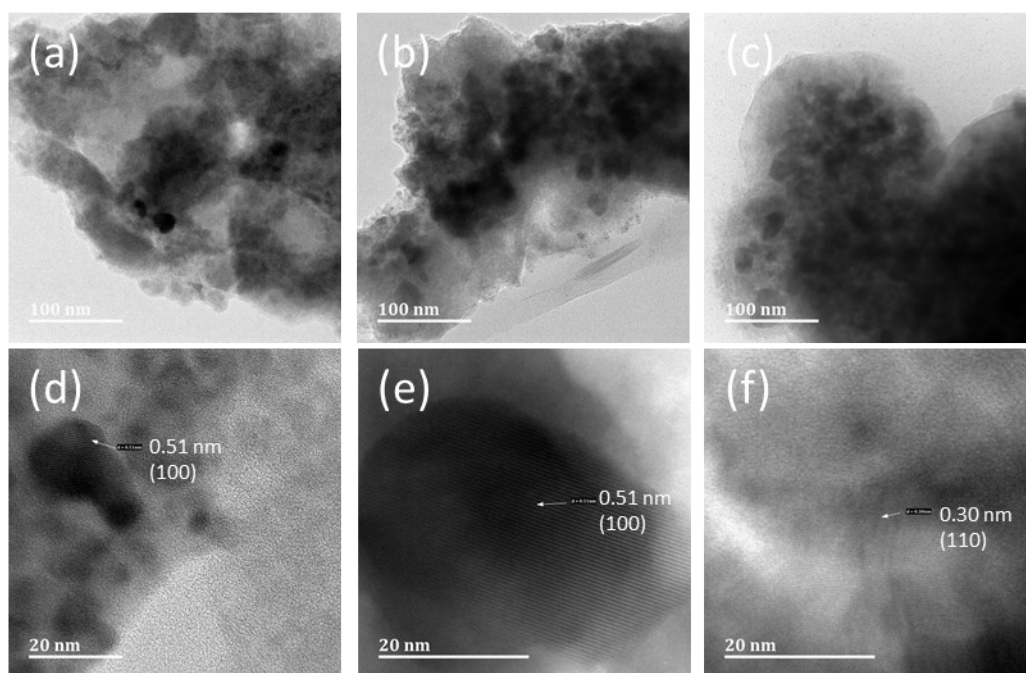

Figure S4: TEM images of (a) Ni<sub>2</sub>P (b) 10% Co-Ni<sub>2</sub>P and (c) 10% Fe-Ni<sub>2</sub>P. HRTEM images of (d) Ni<sub>2</sub>P (e) 10% Co-Ni<sub>2</sub>P and (f) 10% Fe-Ni<sub>2</sub>P.

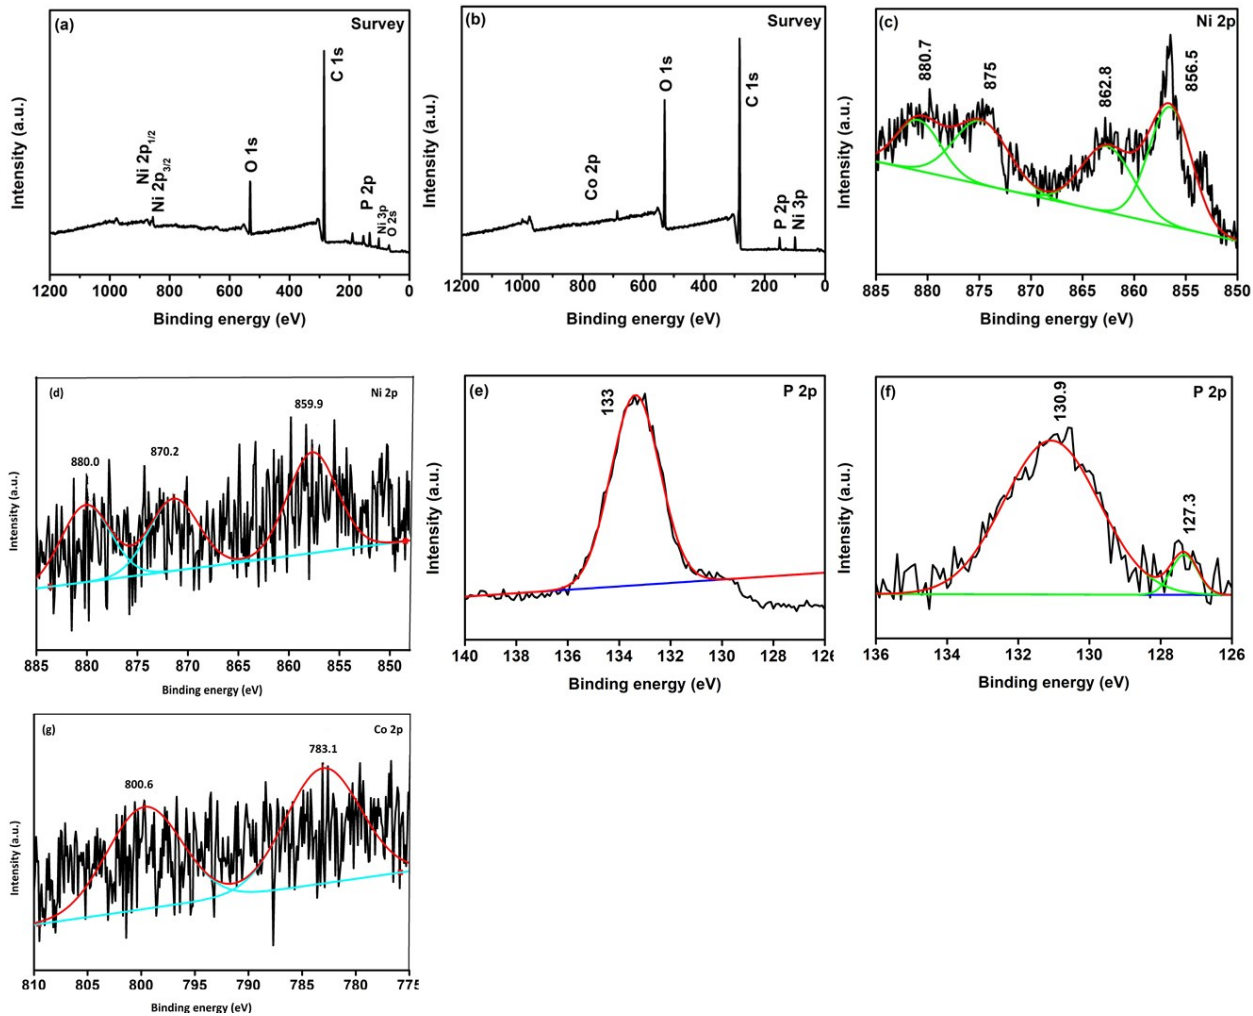

Figure S5: XPS survey spectra of (a) Ni<sub>2</sub>P and (b) Co-Ni<sub>2</sub>P. High resolution spectra of (c) Ni 2p of Ni<sub>2</sub>P, (d) Ni 2p of Co-Ni<sub>2</sub>P, (e) P 2p of Ni<sub>2</sub>P, (f) P 2p of Co-Ni<sub>2</sub>P and (g) Co 2p of Co-Ni<sub>2</sub>P.



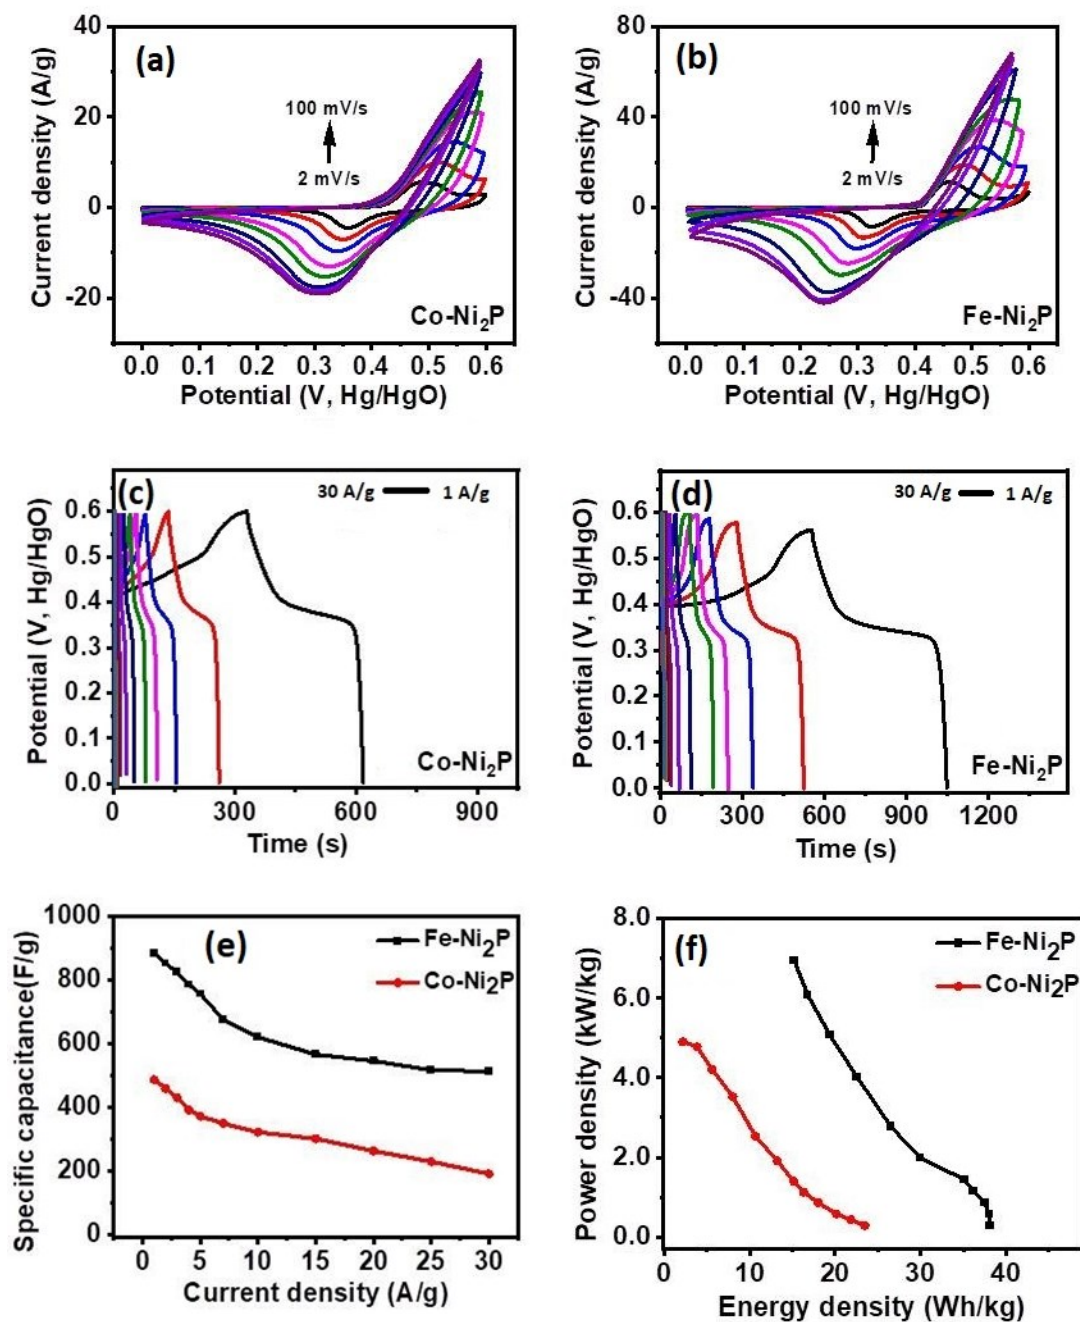

Figure S6: CV curves of (a) 5% Co-Ni<sub>2</sub>P and (b) 5% Fe-Ni<sub>2</sub>P electrodes, GCD curves of (c) 5% Co-Ni<sub>2</sub>P and (d) 5% Fe-Ni<sub>2</sub>P electrodes. Variation of (e) specific density as a function of current density and (f) power density as a function of energy density for 5% Co and Fe-Ni<sub>2</sub>P electrodes.

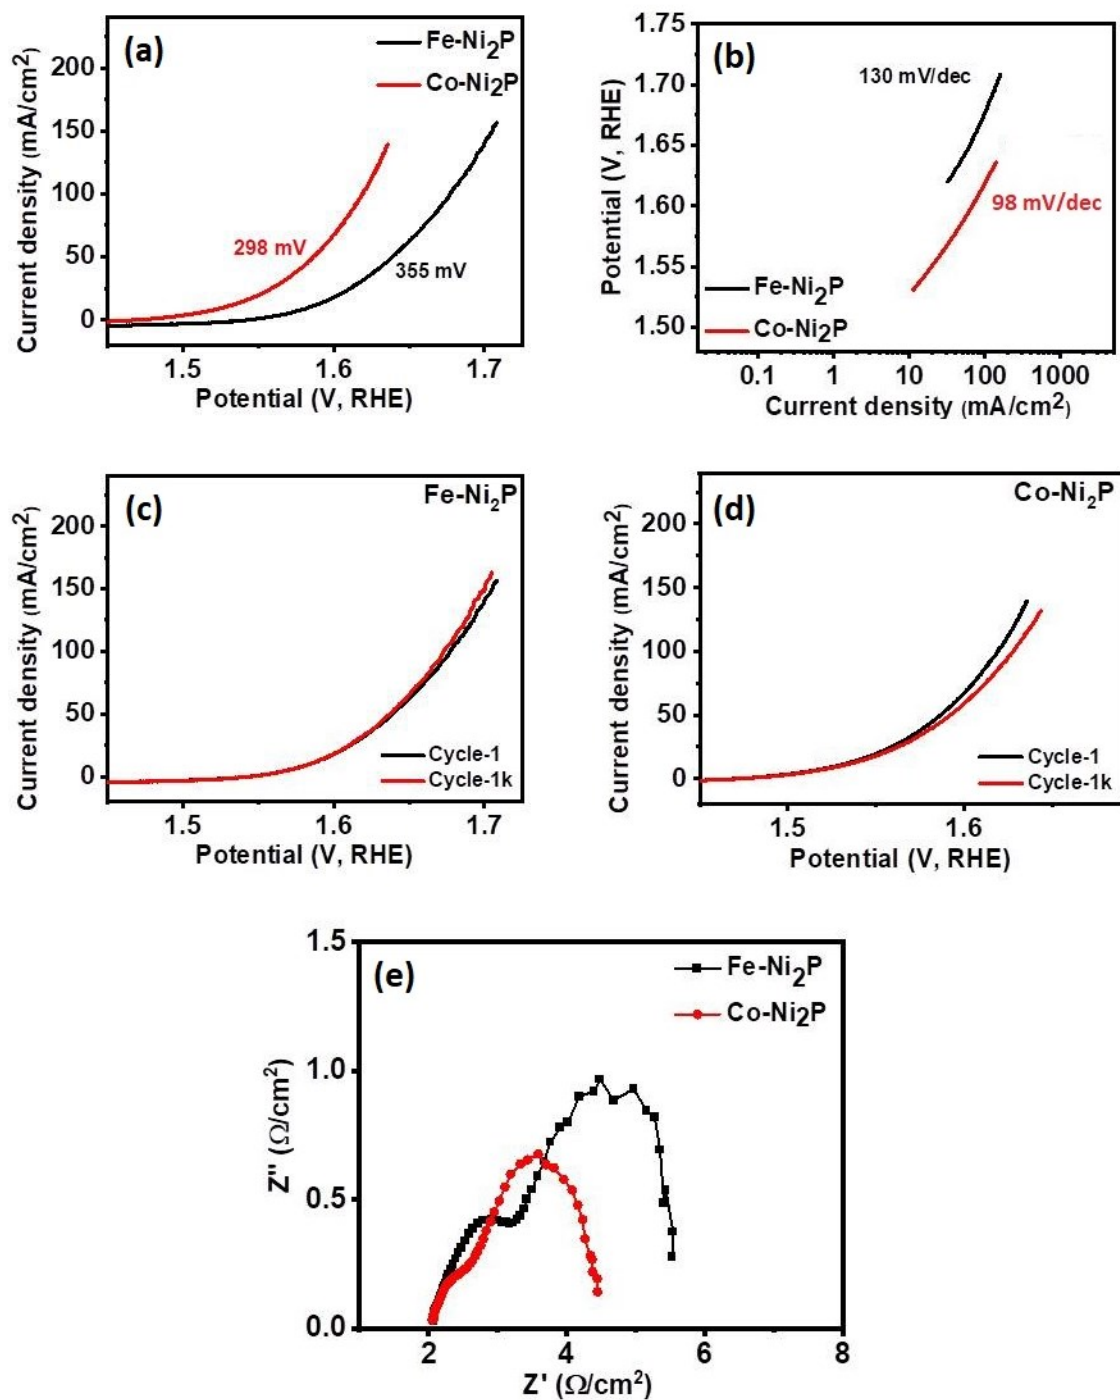

Figure S7: OER polarization curves (a) and Tafel slopes (b) for 5% Co and Fe-Ni<sub>2</sub>P electrodes, OER polarization curves at different cycles for (c) 5% Fe-Ni<sub>2</sub>P and (d) 5% Co-Ni<sub>2</sub>P electrodes and Nyquist plot (e) for 5% Co and Fe-Ni<sub>2</sub>P electrodes.

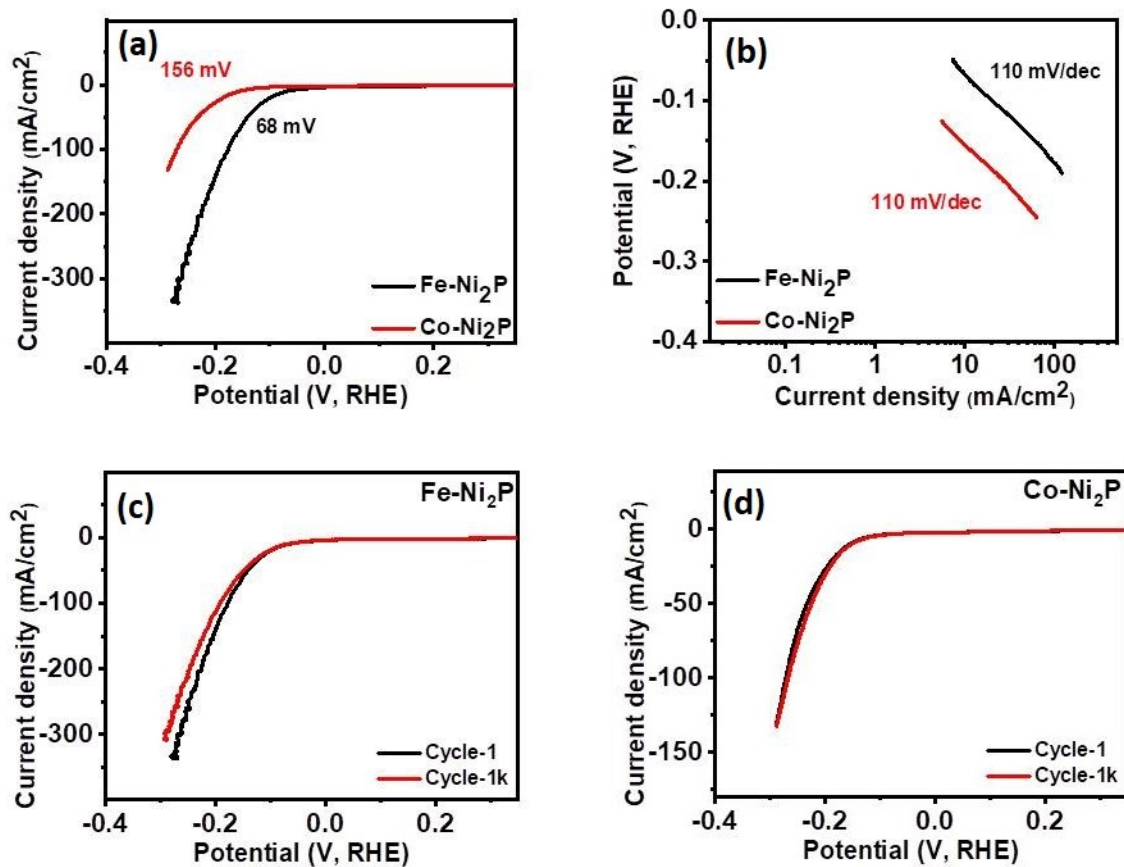

Figure S8: HER polarization curves (a) and Tafel slopes (b) for 5% Co and Fe-Ni<sub>2</sub>P electrodes, HER polarization curves at different cycles for (c) 5% Fe-Ni<sub>2</sub>P and (d) 5% Co-Ni<sub>2</sub>P electrodes.



Table S1: A comparison of some nickel phosphide-based electrodes and our electrodes for supercapacitor applications.

| Name                                                   | Voltage range         | Specific capacitance (F/g) | Reference  |
|--------------------------------------------------------|-----------------------|----------------------------|------------|
| Ni <sub>2</sub> P (organic-phase strategy)             | 0-0.7V (V vs Hg/HgO)  | 418 F/g @ 1 A/g            | 1          |
| Ni-coated Ni <sub>2</sub> P                            | 0-0.7V (V vs Hg/HgO)  | 581 F/g @ 1 A/g            | 1          |
| Ni <sub>5</sub> P <sub>4</sub>                         | 0-0.4V (V vs SCE)     | 801.5 F/g @ 1 A/g          | 2          |
| PPy/Ni <sub>2</sub> P                                  | -0.4-0.4V (V vs SCE)  | 476.5 F/g @ 1 A/g          | 3          |
| Ni <sub>2</sub> P <sub>2</sub> O <sub>7</sub> nanowire | 0-0.4V (V vs Ag/AgCl) | 772.5 F/g @ 1 A/g          | 4          |
| Ni <sub>2</sub> P nanoparticle                         | 0-0.4V (V vs SCE)     | 600.1 F/g @ 1 A/g          | 5          |
| 5% graphene/Ni <sub>2</sub> P nanoparticle             | 0-0.4V (V vs SCE)     | 672.4 F/g @ 1 A/g          | 5          |
| Ni <sub>2</sub> P                                      | 0-0.6V (V vs Hg/HgO)  | 674 F/g @ 1 A/g            | This study |
| Co-Ni <sub>2</sub> P                                   | 0-0.6V (V vs Hg/HgO)  | 864 F/g @ 1 A/g            | This study |
| Fe-Ni <sub>2</sub> P                                   | 0-0.6V (V vs Hg/HgO)  | 856 F/g @ 1 A/g            | This study |

Table S2: A comparison of some nickel phosphide-based electrodes and our electrodes for OER

| Name                                  | Overpotential (mV)<br>@10 mA/cm <sup>2</sup> | Tafel slope<br>(mV/dec) | Reference  |
|---------------------------------------|----------------------------------------------|-------------------------|------------|
| Ni <sub>2</sub> P nano particles      | ~ 500                                        | 70                      | 6          |
| Ni <sub>2</sub> P nano wire           | ~ 400                                        | 60                      | 6          |
| Ni <sub>2</sub> P-CoP                 | 320                                          | 69                      | 7          |
| NiOOH/ Ni <sub>5</sub> P <sub>4</sub> | 290                                          | ~40                     | 8          |
| NiCoP/C nanoboxes                     | 330                                          | 96                      | 9          |
| NiCoP                                 | 280                                          | 87                      | 10         |
| Ni-P nanoplates                       | 300                                          | 64                      | 11         |
| Ni <sub>2</sub> P                     | 340                                          | 103                     | This study |
| Co-Ni <sub>2</sub> P                  | 320                                          | 91                      | This study |
| Fe-Ni <sub>2</sub> P                  | 259                                          | 69                      | This study |

Table S3: A comparison of some nickel phosphide-based electrodes and our electrodes for HER

| Name                                                     | Overpotential | Tafel slope | Reference  |
|----------------------------------------------------------|---------------|-------------|------------|
| Ni <sub>2</sub> P@glassy carbon substrate                | ~ 270         | 84          | 12         |
| Ni <sub>12</sub> P <sub>5</sub> @glassy carbon substrate | ~ 450         | 108         | 12         |
| MOF Ni <sub>2</sub> P                                    | ~ 172         | 62          | 13         |
| MOF Ni <sub>12</sub> P <sub>5</sub>                      | ~ 670         | 270         | 13         |
| Ni <sub>2</sub> P/Carbon-nanosheets                      | 174           | 64          | 14         |
| Ni <sub>2</sub> P particles                              | 310           | 109         | 15         |
| Ni <sub>2</sub> P                                        | 164           | 117         | This study |
| Co-Ni <sub>2</sub> P                                     | 158           | 113         | This study |
| Fe-Ni <sub>2</sub> P                                     | 202           | 113         | This study |

## References

- (1) Lu, Y.; Liu, J.-k.; Liu, X.-y.; Huang, S.; Wang, T.-q.; Wang, X.-l.; Gu, C.-d.; Tu, J.-p.; Mao, S. X. Facile synthesis of Ni-coated Ni<sub>2</sub>P for supercapacitor applications. *CrystEngComm* **2013**, *15*, 7071-7079.
- (2) Wang, D.; Kong, L. B.; Liu, M. C.; Luo, Y. C.; Kang, L. An Approach to Preparing Ni–P with Different Phases for Use as Supercapacitor Electrode Materials. *Chemistry–A European Journal* **2015**, *21*, 17897-17903.
- (3) Liu, S.; Chen, Y.; Ren, J.; Wang, Y.; Wei, W. An effective interaction in polypyrrole/nickel phosphide (PPy/Ni<sub>2</sub>P) for high-performance supercapacitor. *Journal of Solid State Electrochemistry* **2019**, *23*, 3409-3418.
- (4) Zhou, Y.; Liu, C.; Li, X.; Sun, L.; Wu, D.; Li, J.; Huo, P.; Wang, H. Chemical precipitation synthesis of porous Ni<sub>2</sub>P<sub>2</sub>O<sub>7</sub> nanowires for supercapacitor. *Journal of Alloys and Compounds* **2019**, *790*, 36-41.
- (5) Du, W.; Wei, S.; Zhou, K.; Guo, J.; Pang, H.; Qian, X. One-step synthesis and graphene-modification to achieve nickel phosphide nanoparticles with electrochemical properties suitable for supercapacitors. *Materials Research Bulletin* **2015**, *61*, 333-339.
- (6) Han, A.; Chen, H.; Sun, Z.; Xu, J.; Du, P. High catalytic activity for water oxidation based on nanostructured nickel phosphide precursors. *Chemical Communications* **2015**, *51*, 11626-11629.
- (7) Liang, X.; Zheng, B.; Chen, L.; Zhang, J.; Zhuang, Z.; Chen, B. MOF-derived formation of Ni<sub>2</sub>P–CoP bimetallic phosphides with strong interfacial effect toward electrocatalytic water splitting. *ACS Applied Materials & Interfaces* **2017**, *9*, 23222-23229.
- (8) Ledendecker, M.; Krick Calderón, S.; Papp, C.; Steinrück, H. P.; Antonietti, M.; Shalom, M. The synthesis of nanostructured Ni<sub>5</sub>P<sub>4</sub> films and their use as a non-noble bifunctional electrocatalyst for full water splitting. *Angewandte Chemie International Edition* **2015**, *54*, 12361-12365.
- (9) He, P.; Yu, X. Y.; Lou, X. W. Carbon-incorporated nickel–cobalt mixed metal phosphide nanoboxes with enhanced electrocatalytic activity for oxygen evolution. *Angewandte Chemie International Edition* **2017**, *56*, 3897-3900.

- (10) Liang, H.; Gandi, A. N.; Anjum, D. H.; Wang, X.; Schwingenschlögl, U.; Alshareef, H. N. Plasma-assisted synthesis of NiCoP for efficient overall water splitting. *Nano letters* **2016**, *16*, 7718-7725.
- (11) Yu, X.-Y.; Feng, Y.; Guan, B.; Lou, X. W. D.; Paik, U. Carbon coated porous nickel phosphides nanoplates for highly efficient oxygen evolution reaction. *Energy & Environmental Science* **2016**, *9*, 1246-1250.
- (12) Kucernak, A. R.; Sundaram, V. N. N. Nickel phosphide: the effect of phosphorus content on hydrogen evolution activity and corrosion resistance in acidic medium. *Journal of Materials Chemistry A* **2014**, *2*, 17435-17445.
- (13) Tian, T.; Ai, L.; Jiang, J. Metal–organic framework-derived nickel phosphides as efficient electrocatalysts toward sustainable hydrogen generation from water splitting. *RSC Advances* **2015**, *5*, 10290-10295.
- (14) Li, Y.; Cai, P.; Ci, S.; Wen, Z. Strongly Coupled 3D Nanohybrids with Ni<sub>2</sub>P/Carbon Nanosheets as pH-Universal Hydrogen Evolution Reaction Electrocatalysts. *ChemElectroChem* **2017**, *4*, 340-344.
- (15) Yan, L.; Dai, P.; Wang, Y.; Gu, X.; Li, L.; Cao, L.; Zhao, X. In situ synthesis strategy for hierarchically porous Ni<sub>2</sub>P polyhedrons from MOFs templates with enhanced electrochemical properties for hydrogen evolution. *ACS applied materials & interfaces* **2017**, *9*, 11642-11650.
